# Supplementary material for: The relationship between distal trunk morphology and object grasping in the African savannah elephant ( Loxodonta africana )
Source: PeerJ journal article supplement (doi:10.7717/peerj.13108), 2022-03-28

Distal shapes trajectories for the small cube

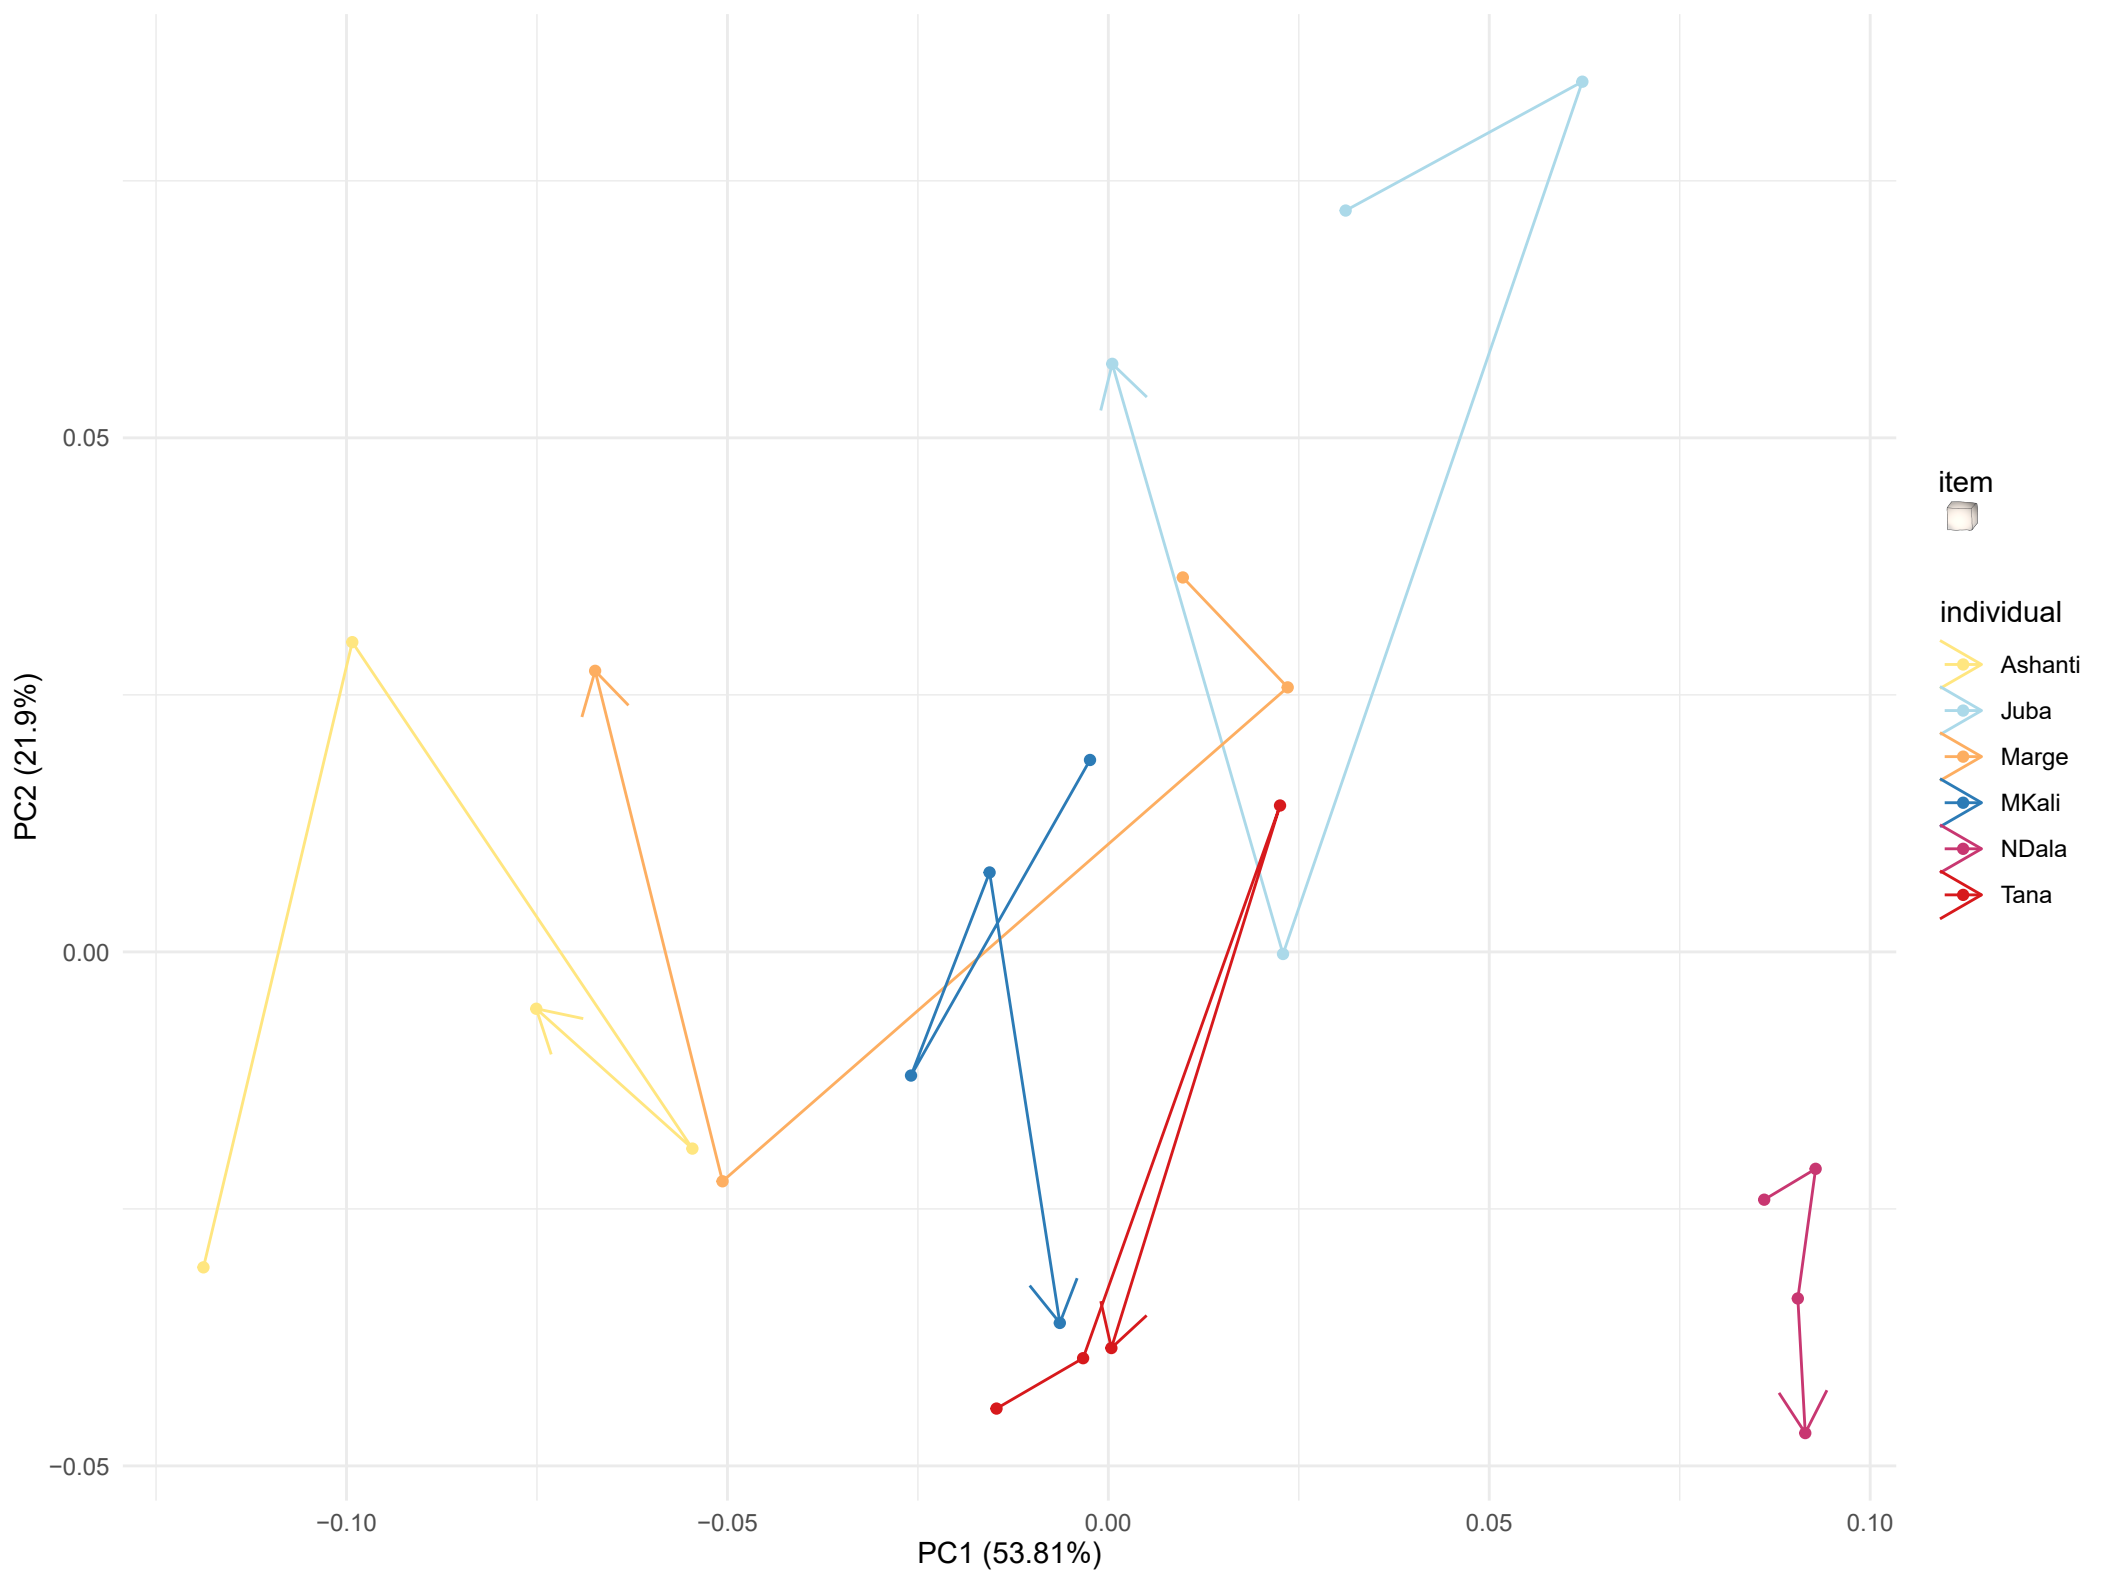

Supplement: SFigure_Small_Cube_64854_JT_staff.pdf [file SFigure_Small_Cube_64854_JT_staff.pdf]
